# Supplementary material
Source: HighWire-hosted journal article supplement (http://www.cmaj.ca/highwire/filestream/59137/field_highwire_adjunct_files/10/diet-salvado-9-at.pdf)
Supplement: diet-salvado-9-at.pdf [file diet-salvado-9-at.pdf]

**Appendix 9: Baseline characteristics of participants with metabolic syndrome at baseline (as supplied by the authors)**

|                                                      | Study groups             |                          |                          |
|------------------------------------------------------|--------------------------|--------------------------|--------------------------|
|                                                      | MedDiet+EVOO<br>(n=1236) | MedDiet+nuts<br>(n=1062) | Control diet<br>(n=1094) |
| Age, years, mean (SD)                                | 67.2 (6.3)               | 66.9 (5.9)               | 67.3 (6.2)               |
| Men % (No.)                                          | 36.3 (449)               | 41.0 (435)               | 36.9 (404)               |
| Smoking habit                                        |                          |                          |                          |
| Former smokers, % (No.)                              | 22.5 (278)               | 25.9 (275)               | 22.0 (241)               |
| Current smokers, % (No.)                             | 12.1 (149)               | 13.4 (142)               | 13.3 (145)               |
| BMI, kg/m <sup>2</sup> - mean (SD)                   | 30.8 (3.6)               | 30.9 (3.6)               | 31.3 (4.1)               |
| Waist circumference, cm - mean (SD)                  | 102.8 (9.4)              | 103.4 (9.4)              | 103.9 (9.8)              |
| Physical activity, METs - mean (SD)                  | 219 (233)                | 223 (221)                | 192 (241)                |
| Mediterranean diet score, 0 to 14 points - mean (SD) | 8.7 (2.0)                | 8.7 (2.0)                | 8.5 (2.0)                |
| Type 2 diabetes mellitus prevalence, % (No.)         | 61.1 (755)               | 56.8 (603)               | 60.1 (658)               |
| Metabolic syndrome components <sup>a</sup>           |                          |                          |                          |
| Abdominal obesity, % (No.)                           | 90.1 (1107)              | 88.5 (934)               | 91.3 (990)               |
| Hypertriglyceridemia, % (No.)                        | 50.0 (615)               | 50.0 (529)               | 50.0 (545)               |
| Low HDL-cholesterol level, % (No.)                   | 44.0 (539)               | 43.9 (463)               | 44.7 (487)               |
| High blood pressure, % (No.)                         | 97.3 (1203)              | 98.2 (1043)              | 98.4 (1077)              |
| High fasting plasma glucose, % (No.)                 | 84.6 (1042)              | 83.3 (880)               | 83.7 (913)               |
| Use of medications                                   |                          |                          |                          |
| Antihypertensive agents, % (No.)                     | 76.6 (945)               | 78.4 (833)               | 75.6 (827)               |
| Statins, % (No.)                                     | 40.0 (495)               | 36.8 (391)               | 38.9 (426)               |
| Fibrates, % (No.)                                    | 6.4 (79)                 | 7.7 (82)                 | 5.9 (65)                 |
| Insulin, % (No.)                                     | 9.3 (115)                | 7.1 (75)                 | 8.6 (94)                 |
| Oral hypoglycaemic agents, % (No.)                   | 42.8 (529)               | 38.4 (408)               | 43.1 (471)               |
| Aspirin or antiplatelet drugs, % (No.)               | 21.6 (267)               | 21.9 (233)               | 24.2 (265)               |

Abbreviations: BMI, body mass index; HDL, high-density lipoprotein; MedDiet, Mediterranean diet; EVOO, extra virgin olive oil.

<sup>a</sup>The metabolic syndrome components were defined according to update harmonizing criteria.
